# Supplementary material
Source: PubMed Central journal article supplement (PMC6040053)
Supplement: pgs-17-1129-s1.pdf [file pgs-17-1129-s1.pdf]

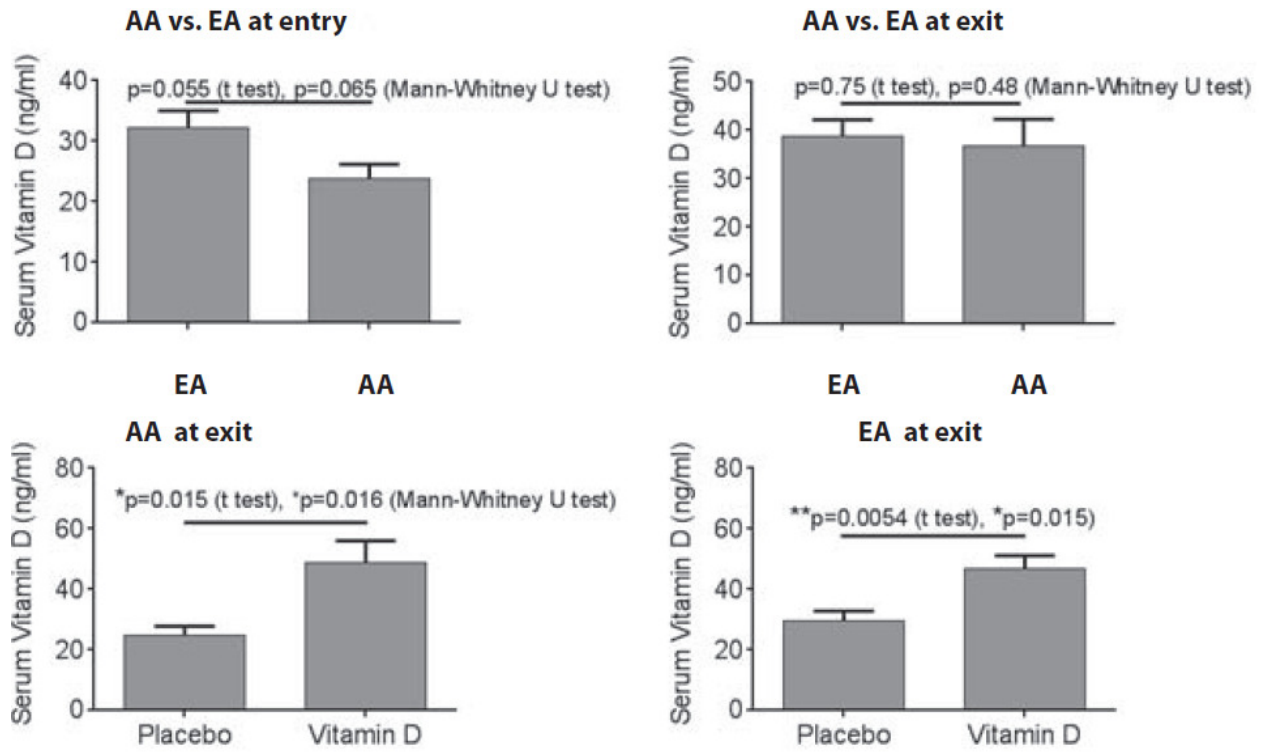

**Figure S1**

**Analysis of serum levels of 25(OH)D in AA and EA at study entry and exit.**

At study entry levels of 25(OH)D in EA and AA were lower in AA compared to EA. This difference was significant. At study exit there was no comparable difference in 25(OH)D levels between EA and AA. These levels were significantly increased in both AA and EA subjects who received vitamin D<sub>3</sub> supplementation compared to subjects receiving placebo. Significance was determined by 1) a two-sample t-test and 2) a Wilcoxon rank sum/Mann-Whitney U test (WMW test).

# Genes up-regulated in prostate cancer samples from AA patients compared to those from European-American patients

European American African American

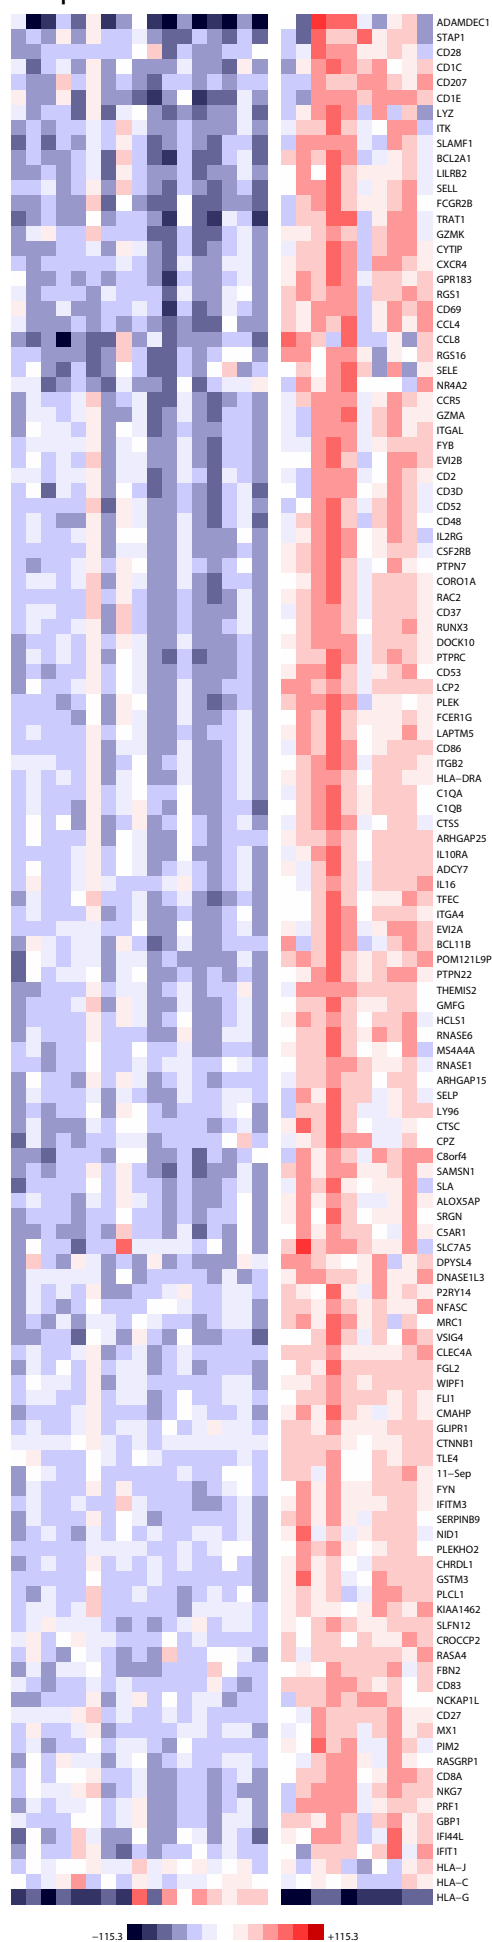

Figure S2

# Human Prostate\_Wallace08\_489genes

European American African American

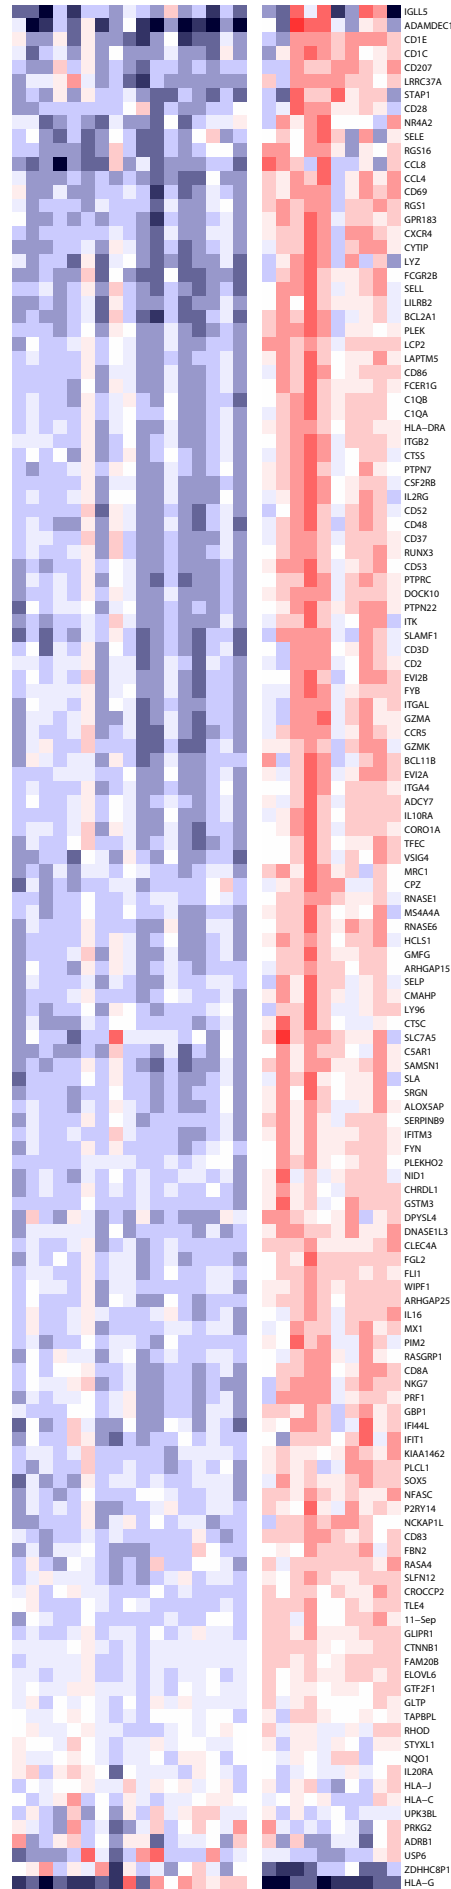

Figure S3
