# Supplementary material
Source: PubMed Central journal article supplement (PMC6040053)
Supplement: pgs-17-1129-s2.pdf [file pgs-17-1129-s2.pdf]

**GO: Biological Process**

| ID         | Name                                                  | Source                 | q-value Bonferroni | Hit Count in Query List | Hit Count in Genome |
|------------|-------------------------------------------------------|------------------------|--------------------|-------------------------|---------------------|
| GO:0006937 | regulation of muscle contraction                      | GO: Biological Process | 1.01E-04           | 16                      | 175                 |
| GO:0090257 | regulation of muscle system process                   | GO: Biological Process | 7.83E-04           | 17                      | 229                 |
| GO:0044057 | regulation of system process                          | GO: Biological Process | 1.73E-03           | 26                      | 526                 |
| GO:0006936 | muscle contraction                                    | GO: Biological Process | 2.44E-03           | 20                      | 337                 |
| GO:0048812 | neuron projection morphogenesis                       | GO: Biological Process | 3.83E-03           | 36                      | 929                 |
| GO:0048667 | cell morphogenesis involved in neuron differentiation | GO: Biological Process | 4.36E-03           | 35                      | 894                 |
| GO:0008016 | regulation of heart contraction                       | GO: Biological Process | 6.32E-03           | 14                      | 182                 |
| GO:0007409 | axonogenesis                                          | GO: Biological Process | 7.13E-03           | 32                      | 794                 |
| GO:0007517 | muscle organ development                              | GO: Biological Process | 7.51E-03           | 21                      | 395                 |
| GO:0003012 | muscle system process                                 | GO: Biological Process | 1.63E-02           | 21                      | 415                 |
| GO:0061564 | axon development                                      | GO: Biological Process | 1.68E-02           | 32                      | 827                 |
| GO:0031175 | neuron projection development                         | GO: Biological Process | 1.95E-02           | 41                      | 1211                |
| GO:0061061 | muscle structure development                          | GO: Biological Process | 2.37E-02           | 27                      | 644                 |
| GO:0048858 | cell projection morphogenesis                         | GO: Biological Process | 2.95E-02           | 40                      | 1188                |
| GO:0032990 | cell part morphogenesis                               | GO: Biological Process | 4.36E-02           | 40                      | 1208                |
| GO:0060047 | heart contraction                                     | GO: Biological Process | 4.40E-02           | 14                      | 215                 |
| GO:1903522 | regulation of blood circulation                       | GO: Biological Process | 4.51E-02           | 16                      | 276                 |
| GO:0003015 | heart process                                         | GO: Biological Process | 4.89E-02           | 14                      | 217                 |
| GO:0014070 | response to organic cyclic compound                   | GO: Biological Process | 5.80E-02           | 32                      | 879                 |
| GO:0006935 | chemotaxis                                            | GO: Biological Process | 7.43E-02           | 32                      | 890                 |
| GO:0042330 | taxis                                                 | GO: Biological Process | 7.76E-02           | 32                      | 892                 |
| GO:0043269 | regulation of ion transport                           | GO: Biological Process | 8.28E-02           | 26                      | 651                 |
| GO:0022008 | neurogenesis                                          | GO: Biological Process | 8.64E-02           | 53                      | 1848                |
| GO:0008015 | blood circulation                                     | GO: Biological Process | 8.68E-02           | 22                      | 500                 |
| GO:0003013 | circulatory system process                            | GO: Biological Process | 9.23E-02           | 22                      | 502                 |

**Pathway**

| ID       | Name                                   | Source                   | q-value Bonferroni | Hit Count in Query List | Hit Count in Genome |
|----------|----------------------------------------|--------------------------|--------------------|-------------------------|---------------------|
| 477129   | <b>Developmental Biology</b>           | BioSystems: REACTOME     | 4.91E-03           | 22                      | 419                 |
| 105688   | Axon guidance                          | BioSystems: REACTOME     | 1.79E-02           | 16                      | 262                 |
| 198906   | Calcium Regulation in the Cardiac Cell | BioSystems: WikiPathways | 7.69E-02           | 11                      | 149                 |
| 105689   | NCAM signaling for neurite out-growth  | BioSystems: REACTOME     | 1.42E-01           | 7                       | 63                  |
| 105698   | <b>Biological oxidations</b>           | BioSystems: REACTOME     | 1.47E-01           | 11                      | 160                 |
| SMP00083 | Acetylsalicylic Acid Pathway           | SMPDB                    | 2.40E-01           | 4                       | 17                  |
| SMP00106 | Meloxicam Pathway                      | SMPDB                    | 4.68E-01           | 4                       | 20                  |
| SMP00084 | Etodolac Pathway                       | SMPDB                    | 4.68E-01           | 4                       | 20                  |
| SMP00096 | Celecoxib Pathway                      | SMPDB                    | 4.68E-01           | 4                       | 20                  |
| SMP00116 | Valdecoxib Pathway                     | SMPDB                    | 4.68E-01           | 4                       | 20                  |
| SMP00087 | Rofecoxib Pathway                      | SMPDB                    | 4.68E-01           | 4                       | 20                  |
| M15394   | Acute Myocardial Infarction            | MSigDB C2: BioCarta      | 4.68E-01           | 4                       | 20                  |

**Coexpression**

| ID                | Name                                                                                                                                          | Source                           | q-value Bonferroni | Hit Count in Query List | Hit Count in Genome |
|-------------------|-----------------------------------------------------------------------------------------------------------------------------------------------|----------------------------------|--------------------|-------------------------|---------------------|
| 18498629-GeneList | Human Breast_Loi08_239genes                                                                                                                   | GeneSigDB                        | 5.68E-10           | 21                      | 178                 |
| M19391            | Genes down-regulated in prostate cancer samples.                                                                                              | MSigDB C2: Broad Institute       | 2.12E-09           | 32                      | 480                 |
| M8124             | Genes up-regulated in basal subtype of breast cancer samples.                                                                                 | MSigDB C2: Broad Institute       | 2.77E-07           | 34                      | 647                 |
| 20421987-TableS1  | Human Lung_Hou10_1067genes                                                                                                                    | GeneSigDB                        | 3.38E-07           | 36                      | 724                 |
| M1834             | Genes up-regulated in freshly isolated CD31- [GeneID=5175] (stromal stem cells from adipose tissue) versus the CD31+ (non-stem) counterparts. | MSigDB C2: Broad Institute       | 5.59E-06           | 20                      | 260                 |
| M17923            | Genes up-regulated in cultured stromal stem cells from adipose tissue, compared to the freshly isolated cells.                                | MSigDB C2: Broad Institute       | 1.21E-05           | 25                      | 425                 |
| 16280042-GeneList | Human Breast_Pawitan05_64genes_prognosisGenes                                                                                                 | GeneSigDB                        | 1.21E-05           | 10                      | 51                  |
| M2761             | Top 100 probe sets contributing to the positive side of the 2nd principal component; associated with adipocytic differentiation.              | MSigDB C2: Aristoteles Universit | 2.02E-05           | 12                      | 87                  |

**Table S1**

Analysis of the 346 prostate transcripts differentially regulated by vitamin D3 supplementation in African Americans that overlap with those differentially expressed between African Americans and European Americans

| GO: Biological Process       |                                                                                                 |                                      |                    |                         |                     |  |
|------------------------------|-------------------------------------------------------------------------------------------------|--------------------------------------|--------------------|-------------------------|---------------------|--|
| ID                           | Name                                                                                            | Source                               | q-value Bonferroni | Hit Count in Query List | Hit Count in Genome |  |
| GO:0045236                   | CXCR chemokine receptor binding                                                                 | GO: Molecular Function               | 4.66E-05           | 7                       | 17                  |  |
| GO:0008092                   | cytoskeletal protein binding                                                                    | GO: Molecular Function               | 5.41E-04           | 44                      | 874                 |  |
| GO:0008009                   | chemokine activity                                                                              | GO: Molecular Function               | 9.07E-04           | 9                       | 47                  |  |
| GO:0042379                   | chemokine receptor binding                                                                      | GO: Molecular Function               | 6.59E-03           | 9                       | 59                  |  |
| GO:0032403                   | protein complex binding                                                                         | GO: Molecular Function               | 5.97E-02           | 44                      | 1053                |  |
| GO:0015631                   | tubulin binding                                                                                 | GO: Molecular Function               | 1.08E-01           | 18                      | 289                 |  |
| GO:0001664                   | G-protein coupled receptor binding                                                              | GO: Molecular Function               | 1.47E-01           | 17                      | 270                 |  |
| GO:0008017                   | microtubule binding                                                                             | GO: Molecular Function               | 2.86E-01           | 14                      | 208                 |  |
| GO:0005126                   | cytokine receptor binding                                                                       | GO: Molecular Function               | 3.03E-01           | 17                      | 287                 |  |
| GO:0003012                   | muscle system process                                                                           | GO: Biological Process               | 9.57E-05           | 30                      | 415                 |  |
| GO:0006936                   | muscle contraction                                                                              | GO: Biological Process               | 9.17E-04           | 25                      | 337                 |  |
| GO:0051270                   | regulation of cellular component movement                                                       | GO: Biological Process               | 1.56E-03           | 43                      | 830                 |  |
| GO:0019932                   | second-messenger-mediated signaling                                                             | GO: Biological Process               | 1.06E-02           | 19                      | 242                 |  |
| GO:0051345                   | positive regulation of hydrolase activity                                                       | GO: Biological Process               | 1.65E-02           | 41                      | 849                 |  |
| GO:0002690                   | positive regulation of leukocyte chemotaxis                                                     | GO: Biological Process               | 1.67E-02           | 11                      | 86                  |  |
| GO:0090257                   | regulation of muscle system process                                                             | GO: Biological Process               | 2.16E-02           | 18                      | 229                 |  |
| GO:0002688                   | regulation of leukocyte chemotaxis                                                              | GO: Biological Process               | 2.21E-02           | 12                      | 106                 |  |
| GO:0050921                   | positive regulation of chemotaxis                                                               | GO: Biological Process               | 3.28E-02           | 13                      | 129                 |  |
| GO:0086064                   | cell communication by electrical coupling involved in cardiac conduction                        | GO: Biological Process               | 3.30E-02           | 6                       | 22                  |  |
| GO:0061337                   | cardiac conduction                                                                              | GO: Biological Process               | 3.97E-02           | 9                       | 61                  |  |
| GO:0002027                   | regulation of heart rate                                                                        | GO: Biological Process               | 4.44E-02           | 11                      | 95                  |  |
| GO:0070098                   | chemokine-mediated signaling pathway                                                            | GO: Biological Process               | 5.11E-02           | 10                      | 79                  |  |
| GO:0055001                   | muscle cell development                                                                         | GO: Biological Process               | 5.16E-02           | 15                      | 176                 |  |
| GO:0051353                   | positive regulation of oxidoreductase activity                                                  | GO: Biological Process               | 5.88E-02           | 8                       | 49                  |  |
| GO:0043085                   | positive regulation of catalytic activity                                                       | GO: Biological Process               | 7.87E-02           | 61                      | 1570                |  |
| GO:2000145                   | regulation of cell motility                                                                     | GO: Biological Process               | 7.88E-02           | 36                      | 751                 |  |
| GO:0014866                   | skeletal myofibril assembly                                                                     | GO: Biological Process               | 7.94E-02           | 4                       | 8                   |  |
| GO:1902622                   | regulation of neutrophil migration                                                              | GO: Biological Process               | 9.16E-02           | 7                       | 38                  |  |
| GO:0040011                   | locomotion                                                                                      | GO: Biological Process               | 9.47E-02           | 71                      | 1932                |  |
| GO:0002687                   | positive regulation of leukocyte migration                                                      | GO: Biological Process               | 1.31E-01           | 12                      | 126                 |  |
| GO:0048870                   | cell motility                                                                                   | GO: Biological Process               | 1.34E-01           | 55                      | 1391                |  |
| GO:0051674                   | localization of cell                                                                            | GO: Biological Process               | 1.34E-01           | 55                      | 1391                |  |
| GO:0019722                   | calcium-mediated signaling                                                                      | GO: Biological Process               | 1.45E-01           | 13                      | 148                 |  |
| GO:0010644                   | cell communication by electrical coupling                                                       | GO: Biological Process               | 1.49E-01           | 6                       | 28                  |  |
| GO:0002685                   | regulation of leukocyte migration                                                               | GO: Biological Process               | 1.69E-01           | 14                      | 172                 |  |
| Pathway                      |                                                                                                 |                                      |                    |                         |                     |  |
| ID                           | Name                                                                                            | Source                               | q-value Bonferroni | Hit Count in Query List | Hit Count in Genome |  |
| 161025                       | Smooth Muscle Contraction                                                                       | BioSystems: REACTOME                 | 3.75E-05           | 8                       | 24                  |  |
| 83050                        | Calcium signaling pathway                                                                       | BioSystems: KEGG                     | 6.49E-04           | 17                      | 181                 |  |
| 106359                       | <b>Chemokine receptors bind chemokines</b>                                                      | BioSystems: REACTOME                 | 4.52E-03           | 9                       | 56                  |  |
| M13494                       | Bioactive Peptide Induced Signaling Pathway                                                     | MSigDB C2: BioCarta                  | 5.16E-03           | 8                       | 43                  |  |
| SMP00368                     | Labetalol Pathway                                                                               | SMPDB                                | 6.26E-03           | 6                       | 21                  |  |
| SMP00367                     | Carvedilol Pathway                                                                              | SMPDB                                | 6.26E-03           | 6                       | 21                  |  |
| P00031                       | Inflammation mediated by chemokine and cytokine signaling pathway                               | PantherDB                            | 6.47E-03           | 16                      | 191                 |  |
| 154409                       | Gastric acid secretion                                                                          | BioSystems: KEGG                     | 7.33E-03           | 10                      | 75                  |  |
| 96530                        | Vascular smooth muscle contraction                                                              | BioSystems: KEGG                     | 1.92E-02           | 12                      | 121                 |  |
| 106261                       | Muscle contraction                                                                              | BioSystems: REACTOME                 | 1.95E-02           | 8                       | 51                  |  |
| 99051                        | Chemokine signaling pathway                                                                     | BioSystems: KEGG                     | 2.48E-02           | 15                      | 189                 |  |
| 119550                       | G alpha (i) signalling events                                                                   | BioSystems: REACTOME                 | 2.72E-02           | 17                      | 238                 |  |
| 908257                       | Adrenergic signaling in cardiomyocytes                                                          | BioSystems: KEGG                     | 3.37E-02           | 13                      | 149                 |  |
| SMP00375                     | Verapamil Pathway                                                                               | SMPDB                                | 4.52E-02           | 8                       | 57                  |  |
| SMP00359                     | Diltiazem Pathway                                                                               | SMPDB                                | 4.52E-02           | 8                       | 57                  |  |
| M16518                       | Wnt/Ca2+/cyclic GMP signaling.                                                                  | MSigDB C2: Signaling Transduction KE | 8.40E-02           | 5                       | 20                  |  |
| 83110                        | Glioma                                                                                          | BioSystems: KEGG                     | 1.19E-01           | 8                       | 65                  |  |
| 105679                       | Caspase-mediated cleavage of cytoskeletal proteins                                              | BioSystems: REACTOME                 | 1.42E-01           | 4                       | 12                  |  |
| Coexpression                 |                                                                                                 |                                      |                    |                         |                     |  |
| ID                           | Name                                                                                            | Source                               | q-value Bonferroni | Hit Count in Query List | Hit Count in Genome |  |
| 17297478-SuppTable5          | Human Intestine_Vecchi07_1024genes                                                              | GeneSigDB                            | 9.13E-11           | 52                      | 781                 |  |
| M18855                       | Up-regulated genes distinguishing between early gastric cancer (EGC) and normal tissue samples. | MSigDB C2: Broad Institute           | 3.78E-08           | 34                      | 428                 |  |
| 18318837-TableS1             | Human MesenchymalStemCells_Yamamoto08_1252genes                                                 | GeneSigDB                            | 4.08E-07           | 48                      | 853                 |  |
| 19204204-SupplementaryTable5 | Human Breast_Parker09_1918genes_IntrinsicGenes_Compilation                                      | GeneSigDB                            | 4.34E-06           | 71                      | 1681                |  |
| 11823860-SuppTable3          | Human Breast_van'tVeer02_2460genes_Ergenes                                                      | GeneSigDB                            | 6.09E-06           | 77                      | 1910                |  |
| 19658189-TableS3             | Human EmbryonicStemCell_Xu09_1311genes                                                          | GeneSigDB                            | 9.56E-06           | 49                      | 969                 |  |

**Table S2**  
**Analysis of the 471 prostate transcripts differentially regulated by vitamin D3 supplementation in African Americans that do not overlap with transcripts differentially expressed between African Americans and European Americans**

**Table S3**

| <b>ID</b>  | <b>Name</b>                                  | <b>q-value<br/>Bonferroni</b> | <b>Hit Count in<br/>Query List</b> | <b>Hit Count in<br/>Genome</b> |
|------------|----------------------------------------------|-------------------------------|------------------------------------|--------------------------------|
| GO:0002684 | positive regulation of immune system process | 6.54E-17                      | 172                                | 732                            |
| GO:0006955 | immune response                              | 4.60E-16                      | 276                                | 1416                           |
| GO:0045321 | leukocyte activation                         | 2.20E-15                      | 162                                | 695                            |
| GO:0001775 | cell activation                              | 1.87E-14                      | 195                                | 916                            |
| GO:0002682 | regulation of immune system process          | 4.74E-14                      | 239                                | 1212                           |
| GO:0046649 | lymphocyte activation                        | 1.04E-11                      | 135                                | 589                            |
| GO:0050776 | regulation of immune response                | 9.61E-11                      | 166                                | 801                            |
| GO:0042110 | T cell activation                            | 4.22E-10                      | 104                                | 428                            |
| GO:0050865 | regulation of cell activation                | 6.94E-10                      | 105                                | 437                            |
| GO:0050778 | positive regulation of immune response       | 1.06E-09                      | 119                                | 524                            |
| GO:0002694 | regulation of leukocyte activation           | 3.00E-09                      | 98                                 | 405                            |
| GO:0048584 | positive regulation of response to stimulus  | 4.40E-09                      | 274                                | 1584                           |

|            |                                                                    |          |     |      |
|------------|--------------------------------------------------------------------|----------|-----|------|
| GO:0050870 | positive regulation of T cell activation                           | 9.61E-09 | 59  | 195  |
| GO:0050867 | positive regulation of cell activation                             | 1.10E-08 | 75  | 281  |
| GO:0051249 | regulation of lymphocyte activation                                | 1.64E-08 | 88  | 357  |
| GO:0006952 | defense response                                                   | 2.71E-08 | 261 | 1515 |
| GO:0002253 | activation of immune response                                      | 3.48E-08 | 100 | 433  |
| GO:0002696 | positive regulation of leukocyte activation                        | 3.92E-08 | 72  | 271  |
| GO:0002252 | immune effector process                                            | 4.28E-08 | 131 | 628  |
| GO:0070661 | leukocyte proliferation                                            | 9.29E-08 | 71  | 270  |
| GO:0032943 | mononuclear cell proliferation                                     | 1.15E-07 | 69  | 260  |
| GO:0050900 | leukocyte migration                                                | 1.66E-07 | 78  | 313  |
| GO:0046651 | lymphocyte proliferation                                           | 2.26E-07 | 68  | 258  |
| GO:0050863 | regulation of T cell activation                                    | 2.62E-07 | 70  | 270  |
| GO:0002429 | immune response-activating cell surface receptor signaling pathway | 4.58E-07 | 63  | 234  |

|            |                                                                    |          |     |      |
|------------|--------------------------------------------------------------------|----------|-----|------|
| GO:0009611 | response to wounding                                               | 5.60E-07 | 219 | 1255 |
| GO:0051251 | positive regulation of lymphocyte activation                       | 1.16E-06 | 65  | 250  |
| GO:0006954 | inflammatory response                                              | 1.18E-06 | 122 | 599  |
| GO:0002757 | immune response-activating signal transduction                     | 3.79E-06 | 86  | 381  |
| GO:0002274 | myeloid leukocyte activation                                       | 4.59E-06 | 46  | 154  |
| GO:0070663 | regulation of leukocyte proliferation                              | 4.63E-06 | 53  | 191  |
| GO:0002768 | immune response-regulating cell surface receptor signaling pathway | 8.14E-06 | 81  | 356  |
| GO:0050851 | antigen receptor-mediated signaling pathway                        | 1.01E-05 | 44  | 147  |
| GO:0002764 | immune response-regulating signaling pathway                       | 1.14E-05 | 102 | 490  |
| GO:0002250 | adaptive immune response                                           | 1.40E-05 | 67  | 276  |
| GO:0032944 | regulation of mononuclear cell proliferation                       | 1.53E-05 | 51  | 186  |

|            |                |          |     |      |
|------------|----------------|----------|-----|------|
| GO:0016477 | cell migration | 1.74E-05 | 187 | 1073 |
|------------|----------------|----------|-----|------|

**Table 3**

| <b>Category</b>        | <b>ID</b>  | <b>Name</b>                               | <b>Source</b> | <b>q-value Bonferroni</b> | <b>Hit Count in Query List</b> | <b>Hit Count in Genome</b> |
|------------------------|------------|-------------------------------------------|---------------|---------------------------|--------------------------------|----------------------------|
| GO: Molecular Function | GO:0008092 | cytoskeletal protein binding              |               | 5.46E-04                  | 60                             | 792                        |
| GO: Molecular Function | GO:0032403 | protein complex binding                   |               | 1.16E-03                  | 66                             | 924                        |
| GO: Molecular Function | GO:0008009 | chemokine activity                        |               | 1.31E-03                  | 11                             | 46                         |
| GO: Molecular Function | GO:0015631 | tubulin binding                           |               | 6.18E-03                  | 26                             | 251                        |
| GO: Molecular Function | GO:0042379 | chemokine receptor binding                |               | 1.24E-02                  | 11                             | 57                         |
| GO: Molecular Function | GO:0008017 | microtubule binding                       |               | 3.82E-02                  | 20                             | 184                        |
| GO: Molecular Function | GO:0001664 | G-protein coupled receptor binding        |               | 1.94E-01                  | 22                             | 239                        |
| GO: Biological Process | GO:0006928 | movement of cell or subcellular component |               | 3.65E-09                  | 125                            | 1703                       |
| GO: Biological Process | GO:0006936 | muscle contraction                        |               | 2.02E-08                  | 40                             | 295                        |

|                              |            |                                     |  |          |     |      |
|------------------------------|------------|-------------------------------------|--|----------|-----|------|
| GO:<br>Biological<br>Process | GO:0003012 | muscle system process               |  | 3.86E-07 | 42  | 352  |
| GO:<br>Biological<br>Process | GO:0040011 | locomotion                          |  | 1.19E-05 | 105 | 1522 |
| GO:<br>Biological<br>Process | GO:0016477 | cell migration                      |  | 2.01E-05 | 81  | 1073 |
| GO:<br>Biological<br>Process | GO:0006937 | regulation of muscle contraction    |  | 2.61E-05 | 23  | 142  |
| GO:<br>Biological<br>Process | GO:0090257 | regulation of muscle system process |  | 3.22E-05 | 26  | 180  |
| GO:<br>Biological<br>Process | GO:0007155 | cell adhesion                       |  | 3.45E-05 | 80  | 1067 |
| GO:<br>Biological<br>Process | GO:0022610 | biological adhesion                 |  | 5.22E-05 | 80  | 1077 |
| GO:<br>Biological<br>Process | GO:0044057 | regulation of system process        |  | 9.65E-05 | 43  | 438  |
| GO:<br>Biological<br>Process | GO:0051674 | localization of cell                |  | 1.02E-04 | 84  | 1170 |
| GO:<br>Biological<br>Process | GO:0048870 | cell motility                       |  | 1.02E-04 | 84  | 1170 |
| GO:<br>Biological<br>Process | GO:0006935 | chemotaxis                          |  | 1.35E-04 | 56  | 661  |



|                              |            |                                                                         |                                       |              |     |      |
|------------------------------|------------|-------------------------------------------------------------------------|---------------------------------------|--------------|-----|------|
| GO:<br>Biological<br>Process | GO:0042330 | taxis                                                                   |                                       | 1.42E-<br>04 | 56  | 662  |
| GO:<br>Biological<br>Process | GO:0051049 | regulation of transport                                                 |                                       | 3.03E-<br>04 | 100 | 1517 |
| GO:<br>Biological<br>Process | GO:0022008 | neurogenesis                                                            |                                       | 6.81E-<br>04 | 95  | 1441 |
| GO:<br>Biological<br>Process | GO:0007267 | cell-cell signaling                                                     |                                       | 6.84E-<br>04 | 87  | 1281 |
| GO:<br>Biological<br>Process | GO:0008016 | regulation of heart<br>contraction                                      |                                       | 8.18E-<br>04 | 22  | 157  |
| GO:<br>Biological<br>Process | GO:0060047 | heart contraction                                                       |                                       | 8.94E-<br>04 | 24  | 184  |
| GO:<br>Biological<br>Process | GO:0003015 | heart process                                                           |                                       | 9.90E-<br>04 | 24  | 185  |
| Pathway                      | 83050      | Calcium signaling pathway                                               | Bio-<br>Systems:<br>KEGG              | 1.26E-<br>05 | 26  | 181  |
| Pathway                      | 198906     | Calcium Regulation in the<br>Cardiac Cell                               | Bio-<br>Systems:<br>Wiki-<br>Pathways | 2.40E-<br>05 | 23  | 149  |
| Pathway                      | P00031     | Inflammation mediated by<br>chemokine and cytokine<br>signaling pathway | PantherD<br>B                         | 3.96E-<br>05 | 26  | 191  |
| Pathway                      | 154409     | Gastric acid secretion                                                  | Bio-<br>Systems:<br>KEGG              | 1.70E-<br>03 | 14  | 75   |

|         |          |                                                          |                       |          |    |     |
|---------|----------|----------------------------------------------------------|-----------------------|----------|----|-----|
| Pathway | 908257   | Adrenergic signaling in cardiomyocytes                   | Bio-Systems: KEGG     | 2.19E-03 | 20 | 149 |
| Pathway | SMP00375 | Verapamil Pathway                                        | SMPDB                 | 2.72E-03 | 12 | 57  |
| Pathway | SMP00359 | Diltiazem Pathway                                        | SMPDB                 | 2.72E-03 | 12 | 57  |
| Pathway | 161025   | Smooth Muscle Contraction                                | Bio-Systems: REACTOME | 3.89E-03 | 8  | 24  |
| Pathway | 698773   | Circadian entrainment                                    | Bio-Systems: KEGG     | 8.31E-03 | 15 | 97  |
| Pathway | M12950   | Angiotensin-converting enzyme 2 regulates heart function | MSigDB C2: BioCarta   | 8.56E-03 | 6  | 13  |
| Pathway | 217716   | Cholinergic synapse                                      | Bio-Systems: KEGG     | 1.30E-02 | 16 | 113 |
| Pathway | 106359   | Chemokine receptors bind chemokines                      | Bio-Systems: REACTOME | 1.53E-02 | 11 | 56  |
| Pathway | SMP00368 | Labetalol Pathway                                        | SMPDB                 | 1.74E-02 | 7  | 21  |
| Pathway | SMP00367 | Carvedilol Pathway                                       | SMPDB                 | 1.74E-02 | 7  | 21  |
| Pathway | 96530    | Vascular smooth muscle contraction                       | Bio-Systems: KEGG     | 3.15E-02 | 16 | 121 |
| Pathway | 119550   | G alpha (i) signalling events                            | Bio-Systems:          | 3.22E-02 | 24 | 238 |

|              |                     |                                                               |                            |          |    |     |
|--------------|---------------------|---------------------------------------------------------------|----------------------------|----------|----|-----|
|              |                     |                                                               | REACTOME                   |          |    |     |
| Pathway      | 106261              | Muscle contraction                                            | Bio-Systems: REACTOME      | 4.03E-02 | 10 | 51  |
| Pathway      | M13494              | Bioactive Peptide Induced Signaling Pathway                   | MSigDB C2: BioCarta        | 6.05E-02 | 9  | 43  |
| Pathway      | 121494              | Dilated cardiomyopathy                                        | Bio-Systems: KEGG          | 7.64E-02 | 13 | 90  |
| Pathway      | 121494              | Dilated cardiomyopathy                                        | Bio-Systems: KEGG          | 7.64E-02 | 13 | 90  |
| Coexpression | 17297478-SuppTable5 | Human Intestine_Vecchi07_1024genes                            | GeneSigDB                  | 2.50E-16 | 82 | 781 |
| Coexpression | 18498629-GeneList   | Human Breast_Loi08_239genes                                   | GeneSigDB                  | 1.90E-14 | 36 | 178 |
| Coexpression | M8124               | Genes up-regulated in basal subtype of breast cancer samples. | MSigDB C2: Broad Institute | 3.47E-14 | 70 | 647 |
| Coexpression | 20421987-TableS1    | Human Lung_Hou10_1067genes                                    | GeneSigDB                  | 1.09E-12 | 72 | 724 |
| Coexpression | M19391              | Genes down-regulated in prostate cancer samples.              | MSigDB C2: Broad Institute | 1.32E-11 | 55 | 480 |
| Coexpression | 18318837-TableS1    | Human MesenchymalStemCells_Yamamoto08_1252genes               | GeneSigDB                  | 1.91E-11 | 77 | 853 |

|              |                     |                                                                                                 |                            |          |     |      |
|--------------|---------------------|-------------------------------------------------------------------------------------------------|----------------------------|----------|-----|------|
| Coexpression | 11823860-SuppTable3 | Human Breast_van'tVeer02_2460genes_Ergenes                                                      | GeneSigDB                  | 2.66E-11 | 130 | 1910 |
| Coexpression | M18855              | Up-regulated genes distinguishing between early gastric cancer (EGC) and normal tissue samples. | MSigDB C2: Broad Institute | 2.99E-11 | 51  | 428  |
| Coexpression | 19014521-TableS6c   | Human Breast_Reyal08_72genes                                                                    | GeneSigDB                  | 6.59E-11 | 20  | 63   |

**Table S4**

| <b>Category</b>        | <b>ID</b>  | <b>Name</b>                               | <b>Source</b> | <b>q-value Bonferroni</b> | <b>Hit Count in Query List</b> | <b>Hit Count in Genome</b> |
|------------------------|------------|-------------------------------------------|---------------|---------------------------|--------------------------------|----------------------------|
| GO: Molecular Function | GO:0008092 | cytoskeletal protein binding              |               | 5.46E-04                  | 60                             | 792                        |
| GO: Molecular Function | GO:0032403 | protein complex binding                   |               | 1.16E-03                  | 66                             | 924                        |
| GO: Molecular Function | GO:0008009 | chemokine activity                        |               | 1.31E-03                  | 11                             | 46                         |
| GO: Molecular Function | GO:0015631 | tubulin binding                           |               | 6.18E-03                  | 26                             | 251                        |
| GO: Molecular Function | GO:0042379 | chemokine receptor binding                |               | 1.24E-02                  | 11                             | 57                         |
| GO: Molecular Function | GO:0008017 | microtubule binding                       |               | 3.82E-02                  | 20                             | 184                        |
| GO: Molecular Function | GO:0001664 | G-protein coupled receptor binding        |               | 1.94E-01                  | 22                             | 239                        |
| GO: Biological Process | GO:0006928 | movement of cell or subcellular component |               | 3.65E-09                  | 125                            | 1703                       |
| GO: Biological Process | GO:0006936 | muscle contraction                        |               | 2.02E-08                  | 40                             | 295                        |

|                              |            |                                     |  |          |     |      |
|------------------------------|------------|-------------------------------------|--|----------|-----|------|
| GO:<br>Biological<br>Process | GO:0003012 | muscle system process               |  | 3.86E-07 | 42  | 352  |
| GO:<br>Biological<br>Process | GO:0040011 | locomotion                          |  | 1.19E-05 | 105 | 1522 |
| GO:<br>Biological<br>Process | GO:0016477 | cell migration                      |  | 2.01E-05 | 81  | 1073 |
| GO:<br>Biological<br>Process | GO:0006937 | regulation of muscle contraction    |  | 2.61E-05 | 23  | 142  |
| GO:<br>Biological<br>Process | GO:0090257 | regulation of muscle system process |  | 3.22E-05 | 26  | 180  |
| GO:<br>Biological<br>Process | GO:0007155 | cell adhesion                       |  | 3.45E-05 | 80  | 1067 |
| GO:<br>Biological<br>Process | GO:0022610 | biological adhesion                 |  | 5.22E-05 | 80  | 1077 |
| GO:<br>Biological<br>Process | GO:0044057 | regulation of system process        |  | 9.65E-05 | 43  | 438  |
| GO:<br>Biological<br>Process | GO:0051674 | localization of cell                |  | 1.02E-04 | 84  | 1170 |
| GO:<br>Biological<br>Process | GO:0048870 | cell motility                       |  | 1.02E-04 | 84  | 1170 |
| GO:<br>Biological<br>Process | GO:0006935 | chemotaxis                          |  | 1.35E-04 | 56  | 661  |

|                              |            |                                                                         |                                       |              |     |      |
|------------------------------|------------|-------------------------------------------------------------------------|---------------------------------------|--------------|-----|------|
| GO:<br>Biological<br>Process | GO:0042330 | taxis                                                                   |                                       | 1.42E-<br>04 | 56  | 662  |
| GO:<br>Biological<br>Process | GO:0051049 | regulation of transport                                                 |                                       | 3.03E-<br>04 | 100 | 1517 |
| GO:<br>Biological<br>Process | GO:0022008 | neurogenesis                                                            |                                       | 6.81E-<br>04 | 95  | 1441 |
| GO:<br>Biological<br>Process | GO:0007267 | cell-cell signaling                                                     |                                       | 6.84E-<br>04 | 87  | 1281 |
| GO:<br>Biological<br>Process | GO:0008016 | regulation of heart<br>contraction                                      |                                       | 8.18E-<br>04 | 22  | 157  |
| GO:<br>Biological<br>Process | GO:0060047 | heart contraction                                                       |                                       | 8.94E-<br>04 | 24  | 184  |
| GO:<br>Biological<br>Process | GO:0003015 | heart process                                                           |                                       | 9.90E-<br>04 | 24  | 185  |
| Pathway                      | 83050      | Calcium signaling pathway                                               | Bio-<br>Systems:<br>KEGG              | 1.26E-<br>05 | 26  | 181  |
| Pathway                      | 198906     | Calcium Regulation in the<br>Cardiac Cell                               | Bio-<br>Systems:<br>Wiki-<br>Pathways | 2.40E-<br>05 | 23  | 149  |
| Pathway                      | P00031     | Inflammation mediated by<br>chemokine and cytokine<br>signaling pathway | PantherD<br>B                         | 3.96E-<br>05 | 26  | 191  |
| Pathway                      | 154409     | Gastric acid secretion                                                  | Bio-<br>Systems:<br>KEGG              | 1.70E-<br>03 | 14  | 75   |

|         |          |                                                          |                       |          |    |     |
|---------|----------|----------------------------------------------------------|-----------------------|----------|----|-----|
| Pathway | 908257   | Adrenergic signaling in cardiomyocytes                   | Bio-Systems: KEGG     | 2.19E-03 | 20 | 149 |
| Pathway | SMP00375 | Verapamil Pathway                                        | SMPDB                 | 2.72E-03 | 12 | 57  |
| Pathway | SMP00359 | Diltiazem Pathway                                        | SMPDB                 | 2.72E-03 | 12 | 57  |
| Pathway | 161025   | Smooth Muscle Contraction                                | Bio-Systems: REACTOME | 3.89E-03 | 8  | 24  |
| Pathway | 698773   | Circadian entrainment                                    | Bio-Systems: KEGG     | 8.31E-03 | 15 | 97  |
| Pathway | M12950   | Angiotensin-converting enzyme 2 regulates heart function | MSigDB C2: BioCarta   | 8.56E-03 | 6  | 13  |
| Pathway | 217716   | Cholinergic synapse                                      | Bio-Systems: KEGG     | 1.30E-02 | 16 | 113 |
| Pathway | 106359   | Chemokine receptors bind chemokines                      | Bio-Systems: REACTOME | 1.53E-02 | 11 | 56  |
| Pathway | SMP00368 | Labetalol Pathway                                        | SMPDB                 | 1.74E-02 | 7  | 21  |
| Pathway | SMP00367 | Carvedilol Pathway                                       | SMPDB                 | 1.74E-02 | 7  | 21  |
| Pathway | 96530    | Vascular smooth muscle contraction                       | Bio-Systems: KEGG     | 3.15E-02 | 16 | 121 |
| Pathway | 119550   | G alpha (i) signalling events                            | Bio-Systems:          | 3.22E-02 | 24 | 238 |



|              |                     |                                                               |                            |          |    |     |
|--------------|---------------------|---------------------------------------------------------------|----------------------------|----------|----|-----|
|              |                     |                                                               | REACTOME                   |          |    |     |
| Pathway      | 106261              | Muscle contraction                                            | Bio-Systems: REACTOME      | 4.03E-02 | 10 | 51  |
| Pathway      | M13494              | Bioactive Peptide Induced Signaling Pathway                   | MSigDB C2: BioCarta        | 6.05E-02 | 9  | 43  |
| Pathway      | 121494              | Dilated cardiomyopathy                                        | Bio-Systems: KEGG          | 7.64E-02 | 13 | 90  |
| Pathway      | 121494              | Dilated cardiomyopathy                                        | Bio-Systems: KEGG          | 7.64E-02 | 13 | 90  |
| Coexpression | 17297478-SuppTable5 | Human Intestine_Vecchi07_1024genes                            | GeneSigDB                  | 2.50E-16 | 82 | 781 |
| Coexpression | 18498629-GeneList   | Human Breast_Loi08_239genes                                   | GeneSigDB                  | 1.90E-14 | 36 | 178 |
| Coexpression | M8124               | Genes up-regulated in basal subtype of breast cancer samples. | MSigDB C2: Broad Institute | 3.47E-14 | 70 | 647 |
| Coexpression | 20421987-TableS1    | Human Lung_Hou10_1067genes                                    | GeneSigDB                  | 1.09E-12 | 72 | 724 |
| Coexpression | M19391              | Genes down-regulated in prostate cancer samples.              | MSigDB C2: Broad Institute | 1.32E-11 | 55 | 480 |
| Coexpression | 18318837-TableS1    | Human MesenchymalStemCells_Yamamoto08_1252genes               | GeneSigDB                  | 1.91E-11 | 77 | 853 |

|              |                     |                                                                                                 |                            |          |     |      |
|--------------|---------------------|-------------------------------------------------------------------------------------------------|----------------------------|----------|-----|------|
| Coexpression | 11823860-SuppTable3 | Human Breast_van'tVeer02_2460genes_Ergenes                                                      | GeneSigDB                  | 2.66E-11 | 130 | 1910 |
| Coexpression | M18855              | Up-regulated genes distinguishing between early gastric cancer (EGC) and normal tissue samples. | MSigDB C2: Broad Institute | 2.99E-11 | 51  | 428  |
| Coexpression | 19014521-TableS6c   | Human Breast_Reyal08_72genes                                                                    | GeneSigDB                  | 6.59E-11 | 20  | 63   |

Table S5

| ID                            | Name                                                                                                                                    | Source                                   | q-value Bonferroni | q-value FDR B&H | Hit Count in Query List | Hit Count in Genoi |
|-------------------------------|-----------------------------------------------------------------------------------------------------------------------------------------|------------------------------------------|--------------------|-----------------|-------------------------|--------------------|
| <b>GO: Molecular Function</b> |                                                                                                                                         |                                          |                    |                 |                         |                    |
| GO:0004896                    | cytokine receptor activity                                                                                                              |                                          | 3.33E-03           | 3.33E-03        | 32                      | 90                 |
| <b>GO: Biological Process</b> |                                                                                                                                         |                                          |                    |                 |                         |                    |
| GO:0006955                    | immune response                                                                                                                         |                                          | 8.87E-26           | 8.87E-26        | 438                     | 1762               |
| GO:0006954                    | inflammatory response                                                                                                                   |                                          | 1.50E-19           | 7.51E-20        | 205                     | 689                |
| GO:0002682                    | regulation of immune system process                                                                                                     |                                          | 3.16E-19           | 1.05E-19        | 390                     | 1626               |
| GO:0070486                    | leukocyte aggregation                                                                                                                   |                                          | 1.80E-16           | 4.49E-17        | 155                     | 494                |
| GO:0007159                    | leukocyte cell-cell adhesion                                                                                                            |                                          | 2.38E-16           | 4.76E-17        | 162                     | 527                |
| GO:0045321                    | leukocyte activation                                                                                                                    |                                          | 3.17E-16           | 5.05E-17        | 222                     | 813                |
| GO:0002684                    | positive regulation of immune system process                                                                                            |                                          | 3.53E-16           | 5.05E-17        | 259                     | 998                |
| GO:0006952                    | defense response                                                                                                                        |                                          | 6.85E-16           | 8.57E-17        | 428                     | 1901               |
| GO:0071593                    | lymphocyte aggregation                                                                                                                  |                                          | 1.97E-15           | 2.19E-16        | 151                     | 487                |
| GO:0070489                    | T cell aggregation                                                                                                                      |                                          | 4.19E-15           | 3.81E-16        | 150                     | 486                |
| GO:0042110                    | T cell activation                                                                                                                       |                                          | 4.19E-15           | 3.81E-16        | 150                     | 486                |
| GO:0034109                    | homotypic cell-cell adhesion                                                                                                            |                                          | 6.69E-15           | 5.58E-16        | 166                     | 562                |
| GO:0001816                    | cytokine production                                                                                                                     |                                          | 2.82E-14           | 2.17E-15        | 191                     | 689                |
| GO:0001775                    | cell activation                                                                                                                         |                                          | 3.63E-14           | 2.59E-15        | 264                     | 1057               |
| GO:0046649                    | lymphocyte activation                                                                                                                   |                                          | 8.12E-13           | 5.41E-14        | 187                     | 690                |
| GO:0002252                    | immune effector process                                                                                                                 |                                          | 1.35E-12           | 8.42E-14        | 216                     | 838                |
| GO:1903039                    | positive regulation of leukocyte cell-cell adhesion                                                                                     |                                          | 1.84E-11           | 1.08E-12        | 82                      | 225                |
| GO:0050776                    | regulation of immune response                                                                                                           |                                          | 2.60E-11           | 1.44E-12        | 253                     | 1052               |
| GO:0050870                    | positive regulation of T cell activation                                                                                                |                                          | 3.48E-11           | 1.83E-12        | 80                      | 219                |
| GO:0034112                    | positive regulation of homotypic cell-cell adhesion                                                                                     |                                          | 4.55E-11           | 2.27E-12        | 81                      | 224                |
| GO:0002694                    | regulation of leukocyte activation                                                                                                      |                                          | 6.02E-11           | 2.87E-12        | 142                     | 498                |
| GO:0050865                    | regulation of cell activation                                                                                                           |                                          | 1.30E-10           | 5.92E-12        | 149                     | 536                |
| GO:0034110                    | regulation of homotypic cell-cell adhesion                                                                                              |                                          | 1.97E-10           | 8.57E-12        | 105                     | 333                |
| GO:0050863                    | regulation of T cell activation                                                                                                         |                                          | 2.61E-10           | 1.05E-11        | 100                     | 312                |
| GO:0098602                    | single organism cell adhesion                                                                                                           |                                          | 2.62E-10           | 1.05E-11        | 208                     | 836                |
| GO:1903037                    | regulation of leukocyte cell-cell adhesion                                                                                              |                                          | 3.35E-10           | 1.29E-11        | 102                     | 322                |
| GO:0001817                    | regulation of cytokine production                                                                                                       |                                          | 5.94E-10           | 2.20E-11        | 164                     | 619                |
| GO:0016337                    | single organismal cell-cell adhesion                                                                                                    |                                          | 7.17E-10           | 2.56E-11        | 196                     | 782                |
| GO:0022610                    | biological adhesion                                                                                                                     |                                          | 7.60E-10           | 2.62E-11        | 333                     | 1518               |
| <b>Pathway</b>                |                                                                                                                                         |                                          |                    |                 |                         |                    |
| 198862                        | TCR Signaling Pathway                                                                                                                   | BioSystems: WikiPathways                 | 5.89E-04           | 2.96E-04        | 34                      | 91                 |
| 83078                         | Hematopoietic cell lineage                                                                                                              | BioSystems: KEGG                         | 8.02E-04           | 2.96E-04        | 33                      | 88                 |
| 83051                         | Cytokine-cytokine receptor interaction                                                                                                  | BioSystems: KEGG                         | 1.05E-03           | 2.96E-04        | 72                      | 265                |
| P00031                        | Inflammation mediated by chemokine and cytokine signaling pathway                                                                       | PantherDB                                | 1.51E-03           | 2.96E-04        | 56                      | 191                |
| 198909                        | B Cell Receptor Signaling Pathway                                                                                                       | BioSystems: WikiPathways                 | 1.52E-03           | 2.96E-04        | 49                      | 159                |
| M9526                         | T Cell Signal Transduction                                                                                                              | MSigDB C2: Signaling Transduction KE     | 1.78E-03           | 2.96E-04        | 21                      | 45                 |
| 160140                        | Signaling by Interleukins                                                                                                               | BioSystems: REACTOME                     | 4.02E-02           | 5.74E-03        | 36                      | 116                |
| 83080                         | T cell receptor signaling pathway                                                                                                       | BioSystems: KEGG                         | 5.43E-02           | 6.42E-03        | 33                      | 104                |
| 99051                         | Chemokine signaling pathway                                                                                                             | BioSystems: KEGG                         | 6.36E-02           | 6.42E-03        | 51                      | 189                |
| 193147                        | Osteoclast differentiation                                                                                                              | BioSystems: KEGG                         | 6.42E-02           | 6.42E-03        | 39                      | 132                |
| 83077                         | Jak-STAT signaling pathway                                                                                                              | BioSystems: KEGG                         | 7.11E-02           | 6.47E-03        | 44                      | 156                |
| 198760                        | IL-4 signaling Pathway                                                                                                                  | BioSystems: WikiPathways                 | 1.12E-01           | 9.31E-03        | 23                      | 64                 |
| 137998                        | TCR signaling in naive CD4+ T cells                                                                                                     | BioSystems: Pathway Interaction Database | 1.54E-01           | 1.18E-02        | 22                      | 61                 |
| 137922                        | IL12-mediated signaling events                                                                                                          | BioSystems: Pathway Interaction Database | 2.04E-01           | 1.46E-02        | 22                      | 62                 |
| 213306                        | Measles                                                                                                                                 | BioSystems: KEGG                         | 2.19E-01           | 1.46E-02        | 38                      | 134                |
| M1467                         | The Co-Stimulatory Signal During T-cell Activation                                                                                      | MSigDB C2: BioCarta                      | 2.40E-01           | 1.50E-02        | 11                      | 21                 |
| 128760                        | Intestinal immune network for IgA production                                                                                            | BioSystems: KEGG                         | 2.97E-01           | 1.70E-02        | 19                      | 51                 |
| 83081                         | B cell receptor signaling pathway                                                                                                       | BioSystems: KEGG                         | 3.06E-01           | 1.70E-02        | 24                      | 72                 |
| <b>Coexpression</b>           |                                                                                                                                         |                                          |                    |                 |                         |                    |
| M10454                        | Genes up-regulated in pulpal tissue extracted from carious teeth.                                                                       | MSigDB C2: University of Washington      | 2.44E-26           | 2.44E-26        | 110                     | 252                |
| M8513                         | Genes up-regulated in the normal-like subtype of breast cancer.                                                                         | MSigDB C2: Broad Institute               | 3.84E-23           | 1.92E-23        | 159                     | 476                |
| M1278                         | Genes down-regulated in pulpal tissue extracted from carious teeth.                                                                     | MSigDB C2: University of Washington      | 9.53E-22           | 3.18E-22        | 101                     | 244                |
| M5369                         | Genes up-regulated in atypical ductal hyperplastic tissues from patients with (ADHC) breast cancer vs those without the cancer (ADH).   | MSigDB C2: Broad Institute               | 5.23E-20           | 1.31E-20        | 109                     | 287                |
| 17174972-TableS1              | Human Zola07_426genes_CellDifferentiationMarkers                                                                                        | GeneSigDB                                | 6.15E-18           | 1.23E-18        | 119                     | 345                |
| M1920                         | Genes forming the macrophage-enriched metabolic network (MEMN) claimed to have a causal relationship with the metabolic syndrom traits. | MSigDB C2: Broad Institute               | 1.39E-16           | 2.31E-17        | 288                     | 1210               |

**Table S6**

| ID                            | Name                                                   | Source                   | q-value Bonferroni | q-value FDR B&H | Hit Count in Query List | Hit Count in Genome |
|-------------------------------|--------------------------------------------------------|--------------------------|--------------------|-----------------|-------------------------|---------------------|
| <b>GO: Molecular Function</b> |                                                        |                          |                    |                 |                         |                     |
| GO:0019899                    | enzyme binding                                         |                          | 1.57E-05           | 1.57E-05        | 453                     | 1851                |
| GO:0032403                    | protein complex binding                                |                          | 1.92E-04           | 9.60E-05        | 272                     | 1053                |
| GO:0044877                    | macromolecular complex binding                         |                          | 9.95E-04           | 3.32E-04        | 382                     | 1578                |
| GO:0008092                    | cytoskeletal protein binding                           |                          | 2.37E-03           | 5.91E-04        | 226                     | 874                 |
| GO:0004672                    | protein kinase activity                                |                          | 2.71E-02           | 5.42E-03        | 161                     | 610                 |
| GO:0016773                    | phosphotransferase activity, alcohol group as acceptor |                          | 3.55E-02           | 5.91E-03        | 185                     | 720                 |
| GO:0030554                    | adenyl nucleotide binding                              |                          | 5.98E-02           | 8.54E-03        | 357                     | 1524                |
| GO:0032559                    | adenyl ribonucleotide binding                          |                          | 8.60E-02           | 1.03E-02        | 354                     | 1516                |
| GO:0050840                    | extracellular matrix binding                           |                          | 9.27E-02           | 1.03E-02        | 24                      | 55                  |
| GO:0005516                    | calmodulin binding                                     |                          | 1.05E-01           | 1.05E-02        | 59                      | 186                 |
| <b>GO: Biological Process</b> |                                                        |                          |                    |                 |                         |                     |
| GO:0030030                    | cell projection organization                           |                          | 2.66E-12           | 2.66E-12        | 447                     | 1642                |
| GO:0022008                    | neurogenesis                                           |                          | 5.57E-06           | 2.79E-06        | 459                     | 1848                |
| GO:0048699                    | generation of neurons                                  |                          | 1.50E-05           | 4.71E-06        | 437                     | 1759                |
| GO:0048666                    | neuron development                                     |                          | 2.50E-05           | 4.71E-06        | 349                     | 1363                |
| GO:0000902                    | cell morphogenesis                                     |                          | 2.85E-05           | 4.71E-06        | 395                     | 1574                |
| GO:0030182                    | neuron differentiation                                 |                          | 2.94E-05           | 4.71E-06        | 408                     | 1634                |
| GO:0007010                    | cytoskeleton organization                              |                          | 3.57E-05           | 4.71E-06        | 299                     | 1142                |
| GO:0048858                    | cell projection morphogenesis                          |                          | 4.02E-05           | 4.71E-06        | 309                     | 1188                |
| GO:0031175                    | neuron projection development                          |                          | 4.24E-05           | 4.71E-06        | 314                     | 1211                |
| GO:0032990                    | cell part morphogenesis                                |                          | 4.86E-05           | 4.86E-06        | 313                     | 1208                |
| GO:0032989                    | cellular component morphogenesis                       |                          | 1.11E-04           | 1.01E-05        | 410                     | 1660                |
| <b>Pathway</b>                |                                                        |                          |                    |                 |                         |                     |
| 83067                         | Focal adhesion                                         | BioSystems: KEGG         | 1.75E-04           | 1.02E-04        | 71                      | 206                 |
| 96530                         | Vascular smooth muscle contraction                     | BioSystems: KEGG         | 2.04E-04           | 1.02E-04        | 48                      | 121                 |
| 833810                        | Non-integrin membrane-ECM interactions                 | BioSystems: REACTOME     | 6.04E-04           | 2.01E-04        | 23                      | 42                  |
| M5884                         | Ensemble of genes encoding core ECM                    | MSigDB C2: MIT           | 1.07E-03           | 2.69E-04        | 86                      | 275                 |
| M3008                         | Genes encoding structural ECM glycoproteins            | MSigDB C2: MIT           | 1.35E-03           | 2.70E-04        | 66                      | 196                 |
| 198906                        | Calcium Regulation in the Cardiac Cell                 | BioSystems: WikiPathways | 1.58E-02           | 2.63E-03        | 51                      | 149                 |
| 698773                        | Circadian entrainment                                  | BioSystems: KEGG         | 1.89E-02           | 2.70E-03        | 37                      | 97                  |
| 160966                        | Cell junction organization                             | BioSystems: REACTOME     | 2.85E-02           | 3.26E-03        | 33                      | 84                  |
| 105688                        | Axon guidance                                          | BioSystems: REACTOME     | 2.94E-02           | 3.26E-03        | 78                      | 262                 |
| 477132                        | Cell-Cell communication                                | BioSystems: REACTOME     | 4.99E-02           | 4.69E-03        | 45                      | 131                 |
| 106496                        | PLC beta mediated events                               | BioSystems: REACTOME     | 5.64E-02           | 4.69E-03        | 21                      | 45                  |
